# Supplementary material
Source: PubMed Central journal article supplement (PMC7919724)
Supplement: jci-131-137681-s043.pdf [file jci-131-137681-s043.pdf]

*Supplemental materials for*  
**Evolutionary Conservation of human ketodeoxynonulosonic acid  
production is independent of sialoglycan biosynthesis**

Kunio Kawanishi<sup>1,2#\*</sup>, Sudeshna Saha<sup>1,2\*</sup>, Sandra Diaz<sup>1,2</sup>, Michael Vaill<sup>1,2,3</sup>,  
Aniruddha Sasmal<sup>1,2</sup>, Shoib S. Siddiqui<sup>1,2##</sup>, Biswa Choudhury<sup>1</sup>, Kumar Sharma<sup>4###</sup>,  
Xi Chen<sup>5</sup>, Ian C. Schoenhofen<sup>6</sup>, Chihiro Sato<sup>7</sup>, Ken Kitajima<sup>7</sup>, Hudson H. Freeze<sup>8</sup>, Anja  
Münster-Kühnel<sup>9</sup>, and Ajit Varki<sup>1, 2, 3, 4\*\*</sup>.

<sup>1</sup>Glycobiology Research and Training Center, <sup>2</sup>Department of Cellular & Molecular Medicine,  
<sup>3</sup>Center for Academic Research and Training in Anthropogeny, and <sup>4</sup>Department of Medicine,  
University of California, San Diego, La Jolla, CA, USA.

<sup>5</sup>Department of Chemistry, University of California, Davis, Davis, CA, USA

<sup>6</sup>Human Health Therapeutics Research Center, National Research Council of Canada, Ottawa,  
Ontario, K1A 0R6, Canada,

<sup>7</sup>Bioscience and Biotechnology Center, Nagoya University, Nagoya, Japan.

<sup>8</sup>Human Genetics Program, Sanford Burnham Prebys Medical Discovery Institute, La Jolla, CA,  
USA.

<sup>9</sup>Clinical Biochemistry, Hannover Medical School, Hannover, Germany.

\* The contributions of the first two authors are considered equal.

#Current Address: Kidney and Vascular Pathology, Faculty of Medicine, University of Tsukuba,  
Ibaraki, Japan

##Current Address: American University of Ras Al Khaimah (AURAK), United Arab Emirates  
(UAE)

###Current Address: Center for Renal Precision Medicine, Division of Nephrology, Department  
of Medicine, University of Texas Health San Antonio

\*\*Correspondence: [avarki@health.ucsd.edu](mailto:avarki@health.ucsd.edu), University of California, San Diego, 9500 Gilman  
Drive, La Jolla, CA 92093-0687, USA.

**Conflict of interest:** The authors have declared that no conflict of interest exist.

## Supplemental Materials and Methods

*Detection of free  $\alpha$ -ketoacids including sialic acids and by LC-MS.* Analyses of  $\alpha$ -ketoacids including Kdn, Neu5Ac, Neu5Gc (Supplemental Table 1) were done using LTQ-Orbitrap Discovery (Thermo Scientific) mass spectrometry attached to Ultimate3000 HPLC system (Thermo-Dionex) after tagging with DMB. The profiling of  $\alpha$ -ketoacids was done using Phalanx C18 column (150mm x 1.0mm, 5 $\mu$ m) from Higgins Analytical. A step-gradient of solvents at a flow rate of 50  $\mu$ L was used to get optimal separation between the sugar moieties. 5% aqueous methanol containing 0.1% formic acid was used as Solvent-A and mixture of 5% methanol, 45% water and 50% acetonitrile containing 0.1% formic acid was used as Solvent-B; the details of gradient is as follows. For 0-5 min mixture of 83% of solvent-A and 17% of solvent-B; for 5.1-10min 80% of solvent-A and 20% of solvent-B; for 10.1 to 15min 75% of solvent-A and 25% of solvent-B was used; for 15.1-20 min 70% of solvent-A and 30% of solvent-B is used and finally from 20.1-25min 50% solvent-A and 50% solvent-B was used. The mass spectral data was obtained in positive mode.

*Sequence alignments, tests for selection and phylogenetic tree.* Evolutionary analyses of NANS were conducted in MEGA X (Kumar S, Stecher G, Li M, Knyaz C, and Tamura K (2018) MEGA X: Molecular Evolutionary Genetics Analysis across computing platforms. *Molecular Biology and Evolution* 35:1547-1549). Information about sequences are given in Supplemental Table 8. Multiple alignment based on NANS nucleotide sequences was performed using MUSCLE with UPGMA algorithm.

*Detection of Man-6P in human serum and urine by HPAEC-PAD.* The frozen serum and urine samples were thawed and centrifuged at 3,000 rpm for 5 min at 4°C. Samples were divided into two 500  $\mu$ L aliquots and one of them was added Man-6P (0.2  $\mu$ g total per sample). Then the samples were filtered by Microcon-3 filter at 14,000 X g for 20 min at 4°C. Next, the flow through was passed over 1mL column packed with Dowex cation exchange resin (AG 50W-X8, 200-400 mesh). Then the resin was washed with 1 mL ultrapure water and the flow through was collected for Man-6P analysis using HPAEC-PAD (Dionex ICS-3000). CarboPac PA-1 column (Dionex CarboPac PA1 column 4 mm x 250 mm, 4 $\mu$ m, with a 4 mm x 50 mm Guard) was used for

monosaccharide profiling with 100 mM NaOH and 250 mM NaOAc as gradient mixture. Quantification was done by comparing with the known quantity of standard monosaccharides purchased from Sigma.

*Cell fractionation and sodium borohydride treatment.* Cells and media were collected after incubation with mannose. The media was centrifuged and 1.5 mL aliquot was passed filtered through a Microcon-10 filter and lyophilized. Cells were harvested with 10mM EDTA and washed with PBS; suspension cells were directly washed with PBS. Hereon all fractions are kept on ice. The cell pellets were lysed using ice cold water which had been titrated to pH 7.5 with 1M NH<sub>4</sub>OH (for preservation of CMP-glycans) and sonicated with two 15 second bursts, with 15 second rest in-between. The homogenates were centrifuged at 100,000 g for 1 hour. The supernatant was collected, adjusted to 87.5% ethanol and centrifuged at 20,000 g for 10 min. The resulting supernatant was diluted to 10 % ethanol (using pH 7.5 water), frozen and lyophilized; this fraction was called FSF (Free-Sugar Fraction) containing Neu5Ac, Kdn, CMP-Neu5Ac, CMP-Kdn. The resulting pellet was called SPF (Soluble Protein Fraction) and was stored at -80°C. The cell pellet was washed once with 3 mL cold water pH 7.5, sonicated, and centrifugation at 100,000 g for 1 hour. The membrane pellet was suspended in 200 µL water pH 7.5. Sodium borohydride treatment was performed on 25 µL of the FSF and media (after lyophilization, the dried material was dissolved in 200 µL ice-cold water). The sample was mixed with 25 µL of 0.5 M NaBH<sub>4</sub>, incubated at 37°C for 15 min, and quenched with 25 µL 5 M acetic acid, for 5 min at 4°C and 10 min at 37°C. Control samples which were not subjected to borohydride treatment, had 25 µL of water added, 25 µL 5 M acetic acid, and incubated on ice for the first 20 min, and finished with 10 min incubation at 37°C. The pH of each reaction was monitored.

## Supplemental Figures and Tables

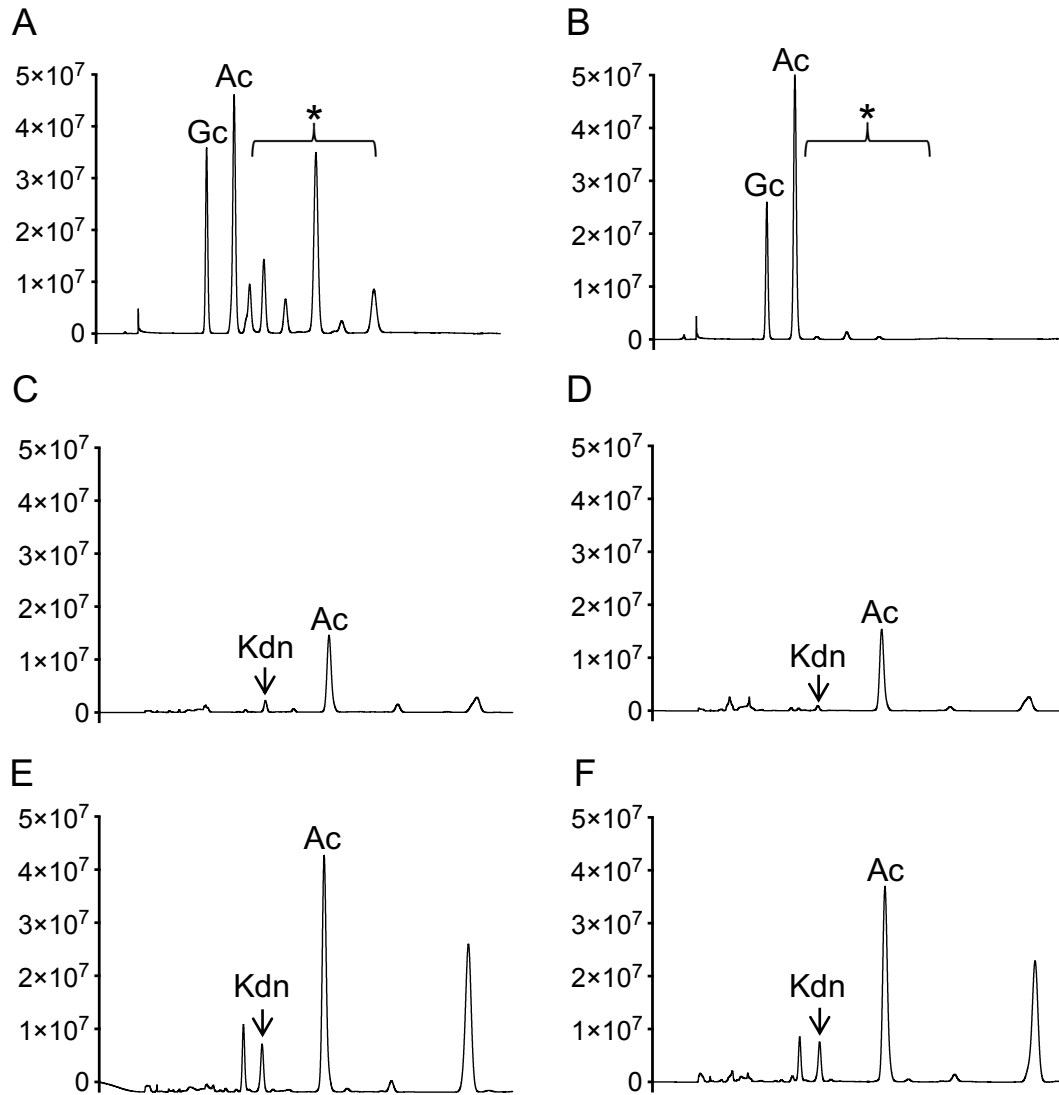

### Supplemental Figure 1. HPLC analyses for free and CMP-sialic acid via de *O*-acetylation.

(A) Bovine submaxillary mucin (BSM) was used as a standard for *O*-acetyl groups of sialic acids (Sias) and (B) the de-*O*-acetylation treatment. *O*-acetyl groups and solubilizing groups such as Neu5Gc7Ac, Neu5,7Ac2 (\*) can be removed with NaOH treatment at 37°C for 30 min. Control (C, D) and ESRD (E, F) serum samples did not show any significant peak shift (0-50 min in HPLC run) after NaOH treatment (D and F), suggesting that there was no *O*-acetyl form accumulation. Kdn, Neu5Ac (Ac), Neu5Gc (Gc) were annotated. Y-axis showed peak counts in HPLC run.

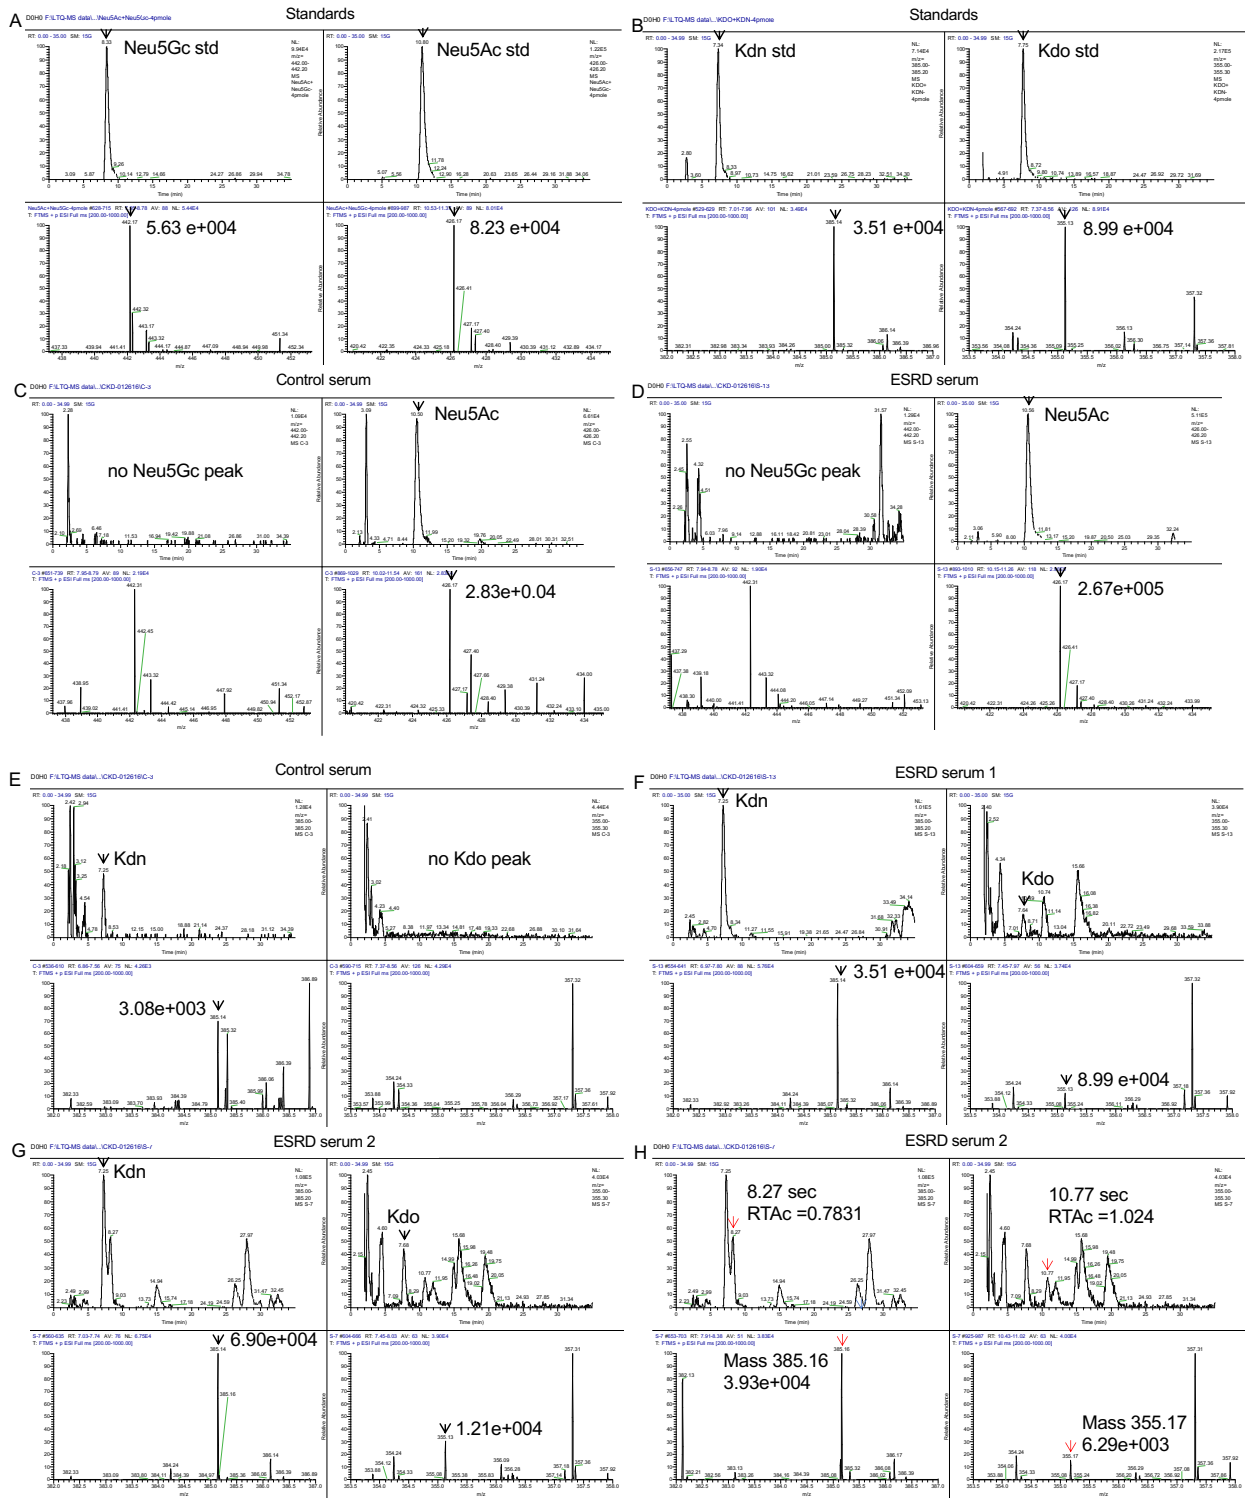

**Supplemental Figure 2. LC/MS analyses for free  $\alpha$ -ketoacids including sialic acids after DMB-tagging.**

Peak analyses of standards (std) for (A) Neu5Gc and Neu5Ac, (B) Kdn and Kdo in LC-MS. Neu5Gc and Neu5Ac peaks in (C) control and, (D) end-stage of renal disease (ESRD) patient

serum. Kdn and Kdo peaks in (E) control and, (F), (G) ESRD. (H) Examples of unknown peaks that were found or significantly accumulated only in ESRD (red arrows). The same data are presented for (G) and (H) with different regions highlighted.

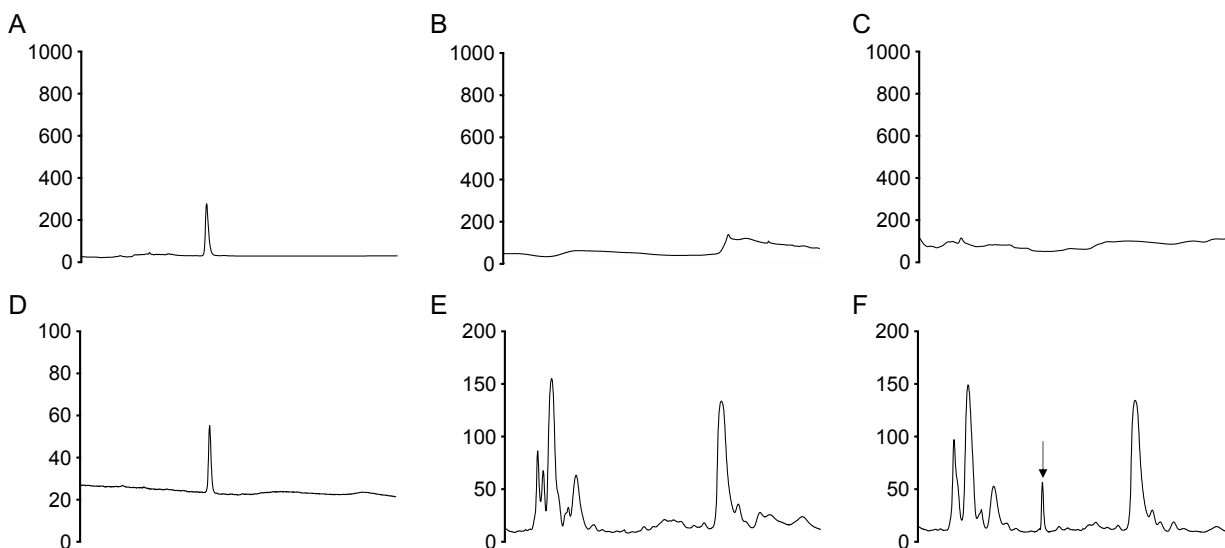

**Supplemental Figure 3. HPAEC-PAD Analyses for Mannose-6P.**

HPAEC-PAD peaks for (A) 0.2  $\mu\text{g}$  (0.8 nmol) Man-6P standard for serum analysis; (B) without and (C) with external 0.2  $\mu\text{g}$  Man-6P adding to the serum sample 1 hour after mannose ingestion when the serum mannose peak comes (Figure 3A). (D) Peaks for 0.2  $\mu\text{g}$  Man-6P standard for urine analysis (E) without and (F) with external 0.2  $\mu\text{g}$  Man-6P addition to the urine collected 4 hours after mannose ingestion when urine mannose peak comes. Man-6P is detected only in the spiked urine sample (arrow) (F), suggesting that Man-6P could not exist in human serum and urine, as well. Y-axis showed peak counts in HPAEC-PAD run.

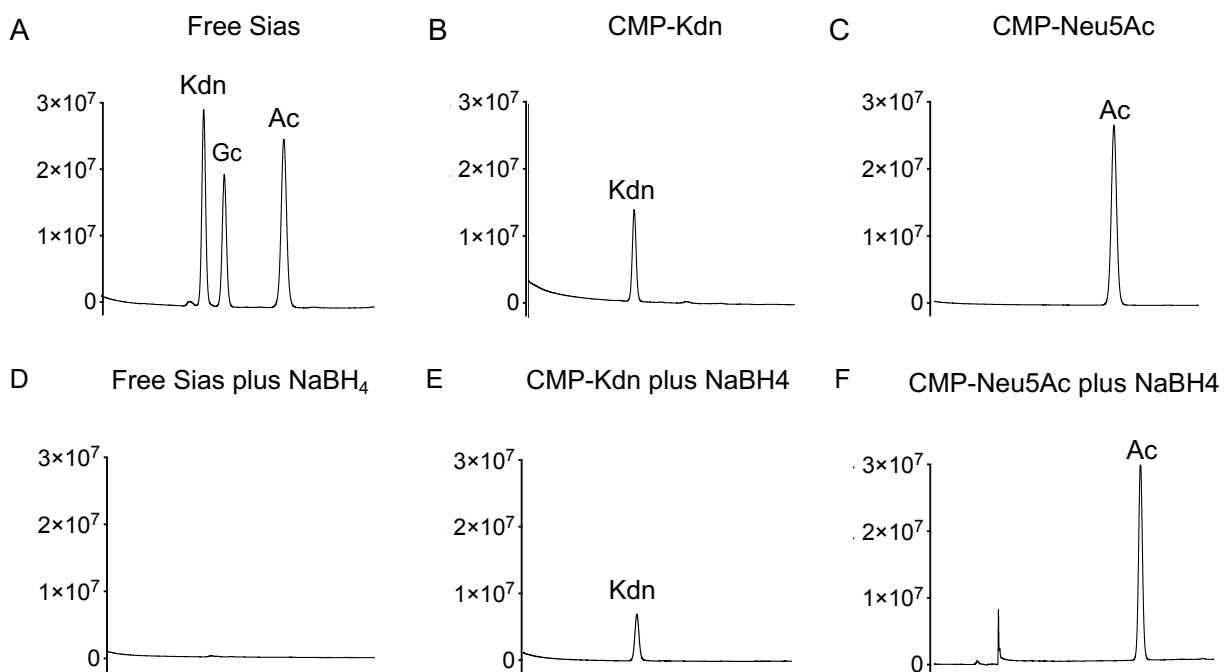

**Supplemental Figure 4. DMB-HPLC analyses for free and CMP-activated form of sialic acids.**

DMB-HPLC peaks for (A) free Sia 100 pmoles standards (Kdn, Neu5Gc (Gc) and Neu5Ac (Ac)); (B) CMP-Kdn; (C) CMP-Neu5Ac. (D) Free form of Kdn, Neu5Gc and Neu5Ac are sensitive to NaBH<sub>4</sub> treatment, but (E) CMP-Kdn and (F) CMP-Neu5Ac are resistant to NaBH<sub>4</sub>.

Y-axis showed peak counts in HPLC run.



| Species                                                      | Nucleotide no. | aa (hNANS) |     |     |     |     |     |     |     |     |     |     |     |     |     |     |     |     |     |     |     |     |
|--------------------------------------------------------------|----------------|------------|-----|-----|-----|-----|-----|-----|-----|-----|-----|-----|-----|-----|-----|-----|-----|-----|-----|-----|-----|-----|
|                                                              |                | 39         | 40  |     |     | 41  |     |     | 42  |     |     | 43  |     |     | 44  |     |     | 45  |     |     |     |     |
|                                                              |                | 115        | 116 | 117 | 118 | 119 | 120 | 121 | 122 | 123 | 124 | 125 | 126 | 127 | 128 | 129 | 130 | 131 | 132 | 133 | 134 | 135 |
| <i>H. sapiens</i> (HUMAN)                                    |                | A          | T   | G   | A   | T   | C   | C   | G   | C   | A   | T   | G   | G   | C   | C   | A   | A   | G   | G   | A   | G   |
| <i>P. troglodytes</i> (CHIMPANZEE)                           |                | A          | T   | G   | A   | T   | C   | C   | G   | C   | A   | T   | G   | G   | C   | C   | A   | A   | G   | G   | A   | G   |
| <i>P. paniscus</i> (BONOBO)                                  |                | A          | T   | G   | A   | T   | C   | C   | G   | C   | A   | T   | G   | G   | C   | C   | A   | A   | G   | G   | A   | G   |
| <i>P. abelii</i> (SUMATRAN ORANGUTAN)                        |                | A          | T   | G   | A   | T   | C   | C   | G   | C   | A   | T   | G   | G   | C   | C   | A   | A   | G   | G   | A   | G   |
| <i>M. mulatta</i> (RHESUS MONKEY)                            |                | A          | T   | G   | A   | T   | C   | C   | G   | C   | A   | T   | G   | G   | C   | C   | A   | A   | G   | G   | A   | G   |
| <i>C. c. imitator</i> (COLOMBIAN WHITE-FACED CAPUCHIN)       |                | A          | T   | G   | A   | T   | C   | C   | G   | C   | G   | T   | G   | G   | C   | C   | A   | A   | G   | G   | A   | G   |
| <i>C. jacchus</i> (COMMON MARMOSSET)                         |                | A          | T   | G   | A   | T   | C   | C   | G   | C   | G   | T   | G   | G   | C   | C   | A   | A   | G   | G   | A   | G   |
| <i>C. ferus</i> (BACTRIAN CAMEL)                             |                | A          | T   | G   | A   | T   | C   | C   | G   | C   | A   | C   | C   | G   | C   | C   | A   | A   | G   | G   | A   | G   |
| <i>E. caballus</i> (HORSE)                                   |                | A          | T   | G   | A   | T   | C   | C   | G   | C   | A   | C   | C   | G   | C   | C   | A   | A   | G   | G   | A   | G   |
| <i>M. murinus</i> (GRAY MOUSE LEMUR)                         |                | A          | T   | G   | A   | T   | C   | C   | G   | C   | A   | C   | C   | G   | C   | C   | A   | A   | G   | G   | A   | G   |
| <i>S. scrofa</i> (WILD BOAR)                                 |                | A          | T   | G   | A   | T   | C   | C   | G   | T   | A   | T   | G   | G   | C   | C   | A   | A   | G   | G   | A   | G   |
| <i>N. a. asiæorientalis</i> (NARROW-RIDGED FINLESS PORPOISE) |                | A          | T   | G   | A   | T   | C   | C   | G   | C   | A   | T   | G   | G   | C   | C   | A   | A   | G   | G   | A   | G   |
| <i>O. orca</i> (ORCA)                                        |                | A          | T   | G   | A   | T   | C   | C   | G   | C   | A   | T   | G   | G   | C   | C   | A   | A   | G   | G   | A   | G   |
| <i>T. truncatus</i> (COMMON BOTTLENOSE DOLPHIN)              |                | A          | T   | G   | A   | T   | C   | C   | G   | C   | A   | T   | G   | G   | C   | C   | A   | A   | G   | G   | A   | G   |
| <i>L. vexillifer</i> (BAJI-DOPHIN)                           |                | A          | T   | G   | A   | T   | C   | C   | G   | C   | A   | T   | G   | G   | C   | C   | A   | A   | G   | G   | A   | G   |
| <i>P. catodon</i> (SPERM WHALE)                              |                | A          | T   | G   | A   | T   | C   | C   | G   | C   | A   | T   | G   | G   | C   | C   | A   | A   | G   | G   | A   | G   |
| <i>E. asinus</i> (DONKEY)                                    |                | A          | T   | G   | A   | T   | C   | C   | G   | C   | A   | C   | G   | G   | C   | C   | A   | A   | G   | G   | A   | G   |
| <i>A. jubatus</i> (CHEETAH)                                  |                | A          | T   | G   | A   | T   | C   | C   | G   | C   | A   | C   | G   | G   | C   | C   | A   | A   | G   | G   | A   | G   |
| <i>U. a. horribilis</i> (GRIZZLY BEAR)                       |                | A          | T   | G   | A   | T   | C   | C   | G   | C   | A   | C   | G   | G   | C   | C   | A   | A   | G   | G   | A   | G   |
| <i>B. bubalis</i> (BUFFALO)                                  |                | A          | T   | G   | A   | T   | C   | C   | G   | C   | A   | T   | G   | G   | C   | T   | A   | A   | G   | G   | A   | G   |
| <i>Z. californianus</i> (CALIFORNIA SEA LION)                |                | A          | T   | G   | A   | T   | C   | C   | G   | C   | A   | C   | G   | G   | C   | C   | A   | A   | G   | G   | A   | G   |
| <i>P. t. altaica</i> (SIBERIAN TIGER)                        |                | A          | T   | G   | A   | T   | C   | C   | G   | C   | A   | C   | G   | G   | C   | C   | A   | A   | G   | G   | A   | G   |
| <i>O. r. divergens</i> (WALRUS)                              |                | A          | T   | G   | A   | T   | C   | C   | G   | C   | A   | C   | G   | G   | C   | C   | A   | A   | G   | G   | A   | G   |
| <i>B. b. bison</i> (PLAINS BISON)                            |                | A          | T   | G   | A   | T   | C   | C   | G   | C   | A   | T   | G   | G   | C   | T   | A   | A   | G   | G   | A   | G   |
| <i>C. l. dingo</i> (DINGO)                                   |                | A          | T   | G   | A   | T   | C   | C   | G   | C   | A   | C   | G   | G   | C   | T   | A   | A   | G   | G   | A   | G   |
| <i>C. l. familiaris</i> (DOMESTIC DOG)                       |                | A          | T   | G   | A   | T   | C   | C   | G   | C   | A   | C   | G   | G   | C   | T   | A   | A   | G   | G   | A   | G   |
| <i>A. melanoleuca</i> (GIANT PANDA)                          |                | A          | T   | G   | A   | T   | C   | C   | G   | C   | A   | C   | G   | G   | C   | T   | A   | A   | G   | G   | A   | G   |
| <i>B. mutus</i> (WILD YAK)                                   |                | A          | T   | G   | A   | T   | C   | C   | G   | C   | A   | T   | G   | G   | C   | T   | A   | A   | G   | G   | A   | G   |
| <i>V. vulpes</i> (RED-FOX)                                   |                | A          | T   | G   | A   | T   | C   | C   | G   | C   | A   | C   | G   | G   | C   | T   | A   | A   | G   | G   | A   | G   |
| <i>C. hircus</i> (GOAT)                                      |                | A          | T   | G   | A   | T   | C   | C   | G   | C   | A   | T   | G   | G   | C   | T   | A   | A   | G   | G   | A   | G   |
| <i>B. taurus</i> (CATTLE)                                    |                | A          | T   | G   | A   | T   | C   | C   | G   | C   | A   | T   | G   | G   | C   | T   | A   | A   | G   | G   | A   | G   |
| <i>C. canadensis</i> (NORTH AMERICAN BEAVER)                 |                | A          | T   | G   | A   | T   | C   | C   | G   | C   | A   | C   | G   | G   | C   | C   | A   | A   | G   | G   | A   | G   |
| <i>O. aries</i> (SHEEP)                                      |                | A          | T   | G   | A   | T   | C   | C   | T   | C   | A   | T   | G   | G   | C   | T   | A   | A   | G   | G   | A   | G   |
| <i>C. s. simum</i> (SOUTHERN WHITE RHINOZEROS)               |                | A          | T   | G   | A   | T   | C   | C   | G   | C   | A   | C   | G   | G   | C   | C   | A   | A   | G   | G   | A   | G   |
| <i>O. v. texanus</i> (WHITE-TAILED DEER)                     |                | A          | T   | G   | A   | T   | C   | C   | G   | C   | A   | T   | G   | G   | C   | T   | A   | A   | G   | G   | A   | G   |
| <i>L. africana</i> (AFRICAN BUSH ELEFANT)                    |                | A          | T   | G   | A   | T   | C   | C   | G   | C   | A   | C   | G   | G   | C   | G   | A   | A   | G   | G   | A   | G   |
| <i>I. tridecemlineatus</i> (THIRTEEN-LINED GROUND SQUIRREL)  |                | A          | T   | G   | A   | T   | C   | C   | G   | C   | A   | C   | A   | G   | C   | C   | A   | A   | G   | G   | A   | G   |
| <i>C. griseus</i> (CHINESE HAMSTER)                          |                | A          | T   | G   | A   | T   | C   | C   | G   | C   | A   | C   | T   | G   | C   | C   | A   | A   | G   | G   | A   | G   |
| <i>M. musculus</i> (HOUSE MOUSE)                             |                | A          | T   | G   | A   | T   | C   | C   | G   | C   | A   | C   | T   | G   | C   | C   | A   | A   | G   | G   | A   | G   |
| <i>G. japonicus</i> (SCHLEGELS JAPANESE GECKO)               |                | A          | T   | G   | A   | T   | T   | C   | G   | C   | G   | T   | G   | G   | C   | C   | A   | A   | G   | G   | A   | G   |
| <i>P. muralis</i> (COMMON WALL LIZARD)                       |                | A          | T   | G   | A   | T   | C   | C   | G   | A   | G   | T   | G   | G   | C   | T   | A   | A   | G   | G   | A   | A   |
| <i>N. scutatus</i> (TIGER SNAKE)                             |                | A          | T   | G   | A   | T   | C   | C   | G   | G   | G   | T   | G   | G   | C   | T   | A   | A   | G   | G   | A   | A   |
| <i>N. meleagris</i> (HELMETED GUINEAFOWL)                    |                | A          | T   | G   | A   | T   | C   | C   | G   | C   | A   | T   | G   | G   | C   | C   | A   | A   | G   | G   | A   | C   |
| <i>G. gallus</i> (RED JUNGLEFOWL)                            |                | A          | T   | G   | A   | T   | C   | C   | G   | C   | A   | T   | G   | G   | C   | C   | A   | A   | G   | G   | A   | G   |
| <i>N. perdicaria</i> (CHILEAN TINAMOU)                       |                | A          | T   | G   | A   | T   | C   | C   | G   | C   | A   | T   | G   | G   | C   | C   | A   | A   | G   | G   | A   | G   |
| <i>A. cucularia</i> (BURROWING OWL)                          |                | A          | T   | G   | A   | T   | C   | C   | G   | C   | A   | T   | G   | G   | C   | C   | A   | A   | G   | G   | A   | C   |
| <i>D. novaehollandiae</i> (EMU)                              |                | A          | T   | G   | A   | T   | C   | C   | G   | C   | A   | T   | G   | G   | C   | C   | A   | A   | G   | G   | A   | T   |
| <i>C. mydas</i> (GREEN SEA TURTLE)                           |                | A          | T   | G   | A   | T   | C   | C   | G   | C   | A   | T   | G   | G   | T   | C   | A   | A   | G   | G   | A   | G   |
| <i>E. telfairi</i> (LESSER HEDGEHOG TENREC)                  |                | A          | T   | G   | A   | T   | C   | C   | G   | C   | A   | C   | G   | G   | C   | G   | A   | A   | G   | G   | A   | G   |
| <i>I. punctatus</i> (CHANNEL CATFISH)                        |                | A          | T   | G   | A   | T   | C   | C   | G   | A   | A   | T   | G   | G   | C   | C   | A   | A   | G   | G   | A   | T   |
| <i>C. porosus</i> (SALTWATER CROCODILE)                      |                | A          | T   | G   | A   | T   | C   | C   | G   | C   | A   | T   | G   | G   | C   | C   | A   | A   | G   | G   | A   | G   |
| <i>D. rerio</i> (ZEBRAFISH)                                  |                | A          | T   | G   | A   | T   | C   | A   | A   | A   | A   | T   | G   | G   | C   | A   | A   | A   | G   | G   | A   | C   |
| <i>C. adamanteus</i> (EASTERN DIAMONDBACK RATTLESNAKE)       |                | A          | T   | G   | A   | T   | C   | C   | G   | G   | C   | T   | G   | G   | T   | C   | A   | A   | G   | G   | A   | C   |
| <i>X. tropicalis</i> (WESTERN CLAWED FROG)                   |                | A          | T   | G   | A   | T   | C   | C   | G   | C   | A   | T   | G   | G   | C   | A   | A   | A   | G   | G   | A   | C   |
| <i>O. mykiss</i> (RAINBOW TROUT)                             |                | A          | T   | G   | A   | T   | C   | A   | A   | G   | A   | T   | G   | G   | C   | C   | A   | A   | G   | G   | A   | C   |
| <i>N. parkeri</i> (HIGH HIMALAYA FROG)                       |                | A          | T   | G   | A   | T   | T   | C   | G   | C   | A   | T   | G   | G   | C   | T   | A   | A   | G   | G   | A   | C   |
| <i>T. c. triunguis</i> (THREE-TOED BOX TURTLE)               |                | A          | T   | G   | A   | T   | C   | C   | G   | C   | A   | T   | G   | G   | T   | C   | A   | A   | G   | G   | A   | G   |
| <i>S. salar</i> (ATLANTIC SALMON)                            |                | A          | T   | G   | A   | T   | C   | A   | A   | G   | A   | T   | G   | G   | C   | C   | A   | A   | G   | G   | A   | C   |
| <i>O. anatinus</i> (PLATYPUS)                                |                | A          | T   | G   | A   | T   | C   | C   | G   | C   | A   | T   | G   | G   | T   | C   | A   | A   | G   | G   | A   | T   |
| <i>P. cinereus</i> (KOALA)                                   |                | A          | T   | G   | A   | T   | C   | C   | G   | G   | A   | T   | G   | G   | C   | A   | A   | A   | G   | G   | A   | G   |
| <i>V. ursinus</i> (COMMON WOMBAT)                            |                | A          | T   | G   | A   | T   | C   | C   | G   | G   | A   | T   | G   | G   | C   | A   | A   | A   | G   | G   | A   | G   |
| <i>M. domestica</i> (GRAY SHORT-TAILED OPOSSUM)              |                | A          | T   | G   | A   | T   | C   | C   | G   | G   | A   | T   | G   | G   | C   | C   | A   | A   | G   | G   | A   | G   |

  

|                |     |
|----------------|-----|
| Actinopterygii | T42 |
| Amphibia       | V42 |
| Aves           | M42 |
| Mammalia       | L42 |
| Reptilia       |     |

### Supplemental Figure 5. Part of a multiple alignment of NANS nucleotide sequences

Codons specifying Methionine (M) and Leucine (L) at position 42 in human NANS (giving rise to NANS with Kdn synthase activity), are shaded in light and dark blue, respectively, while Threonine (T) and Valine (V) are shaded in light and dark grey.

classes: Actinopterygii (light purple), Amphibia (pink), Aves (dark purple) Mammalia (green),  
Reptilia (blue).

**Supplemental Table 1. Standards used for Mass Spectrometry Analysis.**

| <b><math>\alpha</math>-ketoacids</b>                                                     | <b>Abbreviation</b> | <b>Mass</b> | <b>Source</b> |
|------------------------------------------------------------------------------------------|---------------------|-------------|---------------|
| 2-keto-3-deoxy-D-glycero-D-galacto-nononic acid                                          | Kdn                 | 385.14      | Commercial    |
| 3-deoxy-D-manno-oct-2-ulosonic acid                                                      | Kdo                 | 355.13      | Commercial    |
| N-glycolylneuraminic acid                                                                | Neu5Gc              | 442.16      | Commercial    |
| 5,7-diamino-3,5,7,9-tetradecyloxy-D-glycero-D-galacto-non-2-ulosonic (legionaminic) acid | Leg                 | 473         | Commercial    |
| 7-O-acetyl-N-glycolylneuraminic acid                                                     | Neu5Gc7Ac           | 484.17      | *BSM          |
| N-acetylneuraminic acid                                                                  | Neu5Ac              | 426.17      | Commercial    |
| 8-O-acetyl-N-glyconeuraminic acid                                                        | Neu5Gc8Ac           | 484.17      | BSM           |
| 5,7-diamino-3,5,7,9-tetradecyloxy-L-glycero-L-manno-non-2-ulosonic (pseudaminic) acid    | Pse                 | 451         | Commercial    |
| 7-O-acetyl-N-acetylneuraminic acid                                                       | Neu5,7Ac2           | 468.18      | BSM           |
| 9-O-acetyl-N-glyconeuraminic acid                                                        | Neu5Gc9Ac           | 484.17      | BSM           |
| 8-O-acetyl-N-acetylneuraminic acid                                                       | Neu5,8Ac2           | 468.18      | BSM           |
| 9-O-acetyl-N-acetylneuraminic acid                                                       | Neu5,9Ac2           | 468.18      | BSM           |
| 8,9-di-O-acetyl-N-acetylneuraminic acid                                                  | Neu5,8,9Ac3         | 510         | BSM           |
| 7,9-di-O-acetyl-N-acetylneuraminic acid                                                  | Neu5,7,9Ac3         | 510         | BSM           |

Each standard for  $\alpha$ -ketoacids including sialic acids is available in commercial inventories including \*bovine submaxillary mucin (BSM).

**Kdn relative to Neu5Ac increased in various mammalian cells after mannose feeding.**

**Supplemental Table 2. Kdn relative to Neu5Ac in cytosol.**

| Cell line | Mannose concentration |       |       |       |       |       |
|-----------|-----------------------|-------|-------|-------|-------|-------|
|           | 0 mM                  | 1 mM  | 3 mM  | 5 mM  | 10 mM | 15 mM |
| HEK293A   | 0.24                  | 0.27  | 0.31  | 0.31  | 0.38  | 0.42  |
| HUVEC     | 0.07                  | 0.22  | 0.22  | 1.01  | 3.82  | 3.02  |
| BJAB K88  | 1.47                  | 2.19  | 3.66  | 4.87  | 8.84  | 14.23 |
| BJAB K20  | 5.18                  | 10.39 | 49.12 | 28.84 | 26.91 | 90.62 |

**Supplemental Table 3. Kdn relative to Neu5Ac in growth media.**

| Cell line           | Mannose concentration |       |       |
|---------------------|-----------------------|-------|-------|
|                     | 0 mM                  | 5 mM  | 15 mM |
| HEK293A             | 0.127                 | 0.526 | 1.418 |
| HUVEC               | 1.128                 | 1.130 | 1.624 |
| BJAB K88            | 0.121                 | 0.125 | 0.239 |
| BJAB K20            | 0.149                 | 0.453 | 1.780 |
| PMI WT              | 0.098                 | 0.416 | 0.604 |
| PMI KO <sup>#</sup> | 0.527                 | 1.502 | 1.181 |
| HK2                 | 0.815                 | 3.386 | 5.085 |

<sup>#</sup>The corresponding amounts of mannose for PMI KO cells were 25  $\mu$ M, 250  $\mu$ M and 1 mM.

**Supplemental Table 4. \*Total conjugated Kdn relative to Neu5Ac in total cell lysate with NaOH and NaBH<sub>4</sub>.**

| Cell line           | Mannose concentration |       |       |
|---------------------|-----------------------|-------|-------|
|                     | 0 mM                  | 5 mM  | 15 mM |
| HEK293A             | 0.000                 | 0.000 | 0.000 |
| HUVEC               | 0.001                 | 0.002 | 0.003 |
| BJAB K88            | 0.002                 | 0.011 | 0.024 |
| BJAB K20            | 0.013                 | 0.054 | 0.165 |
| PMI WT              | 0.000                 | 0.003 | 0.004 |
| PMI KO <sup>#</sup> | 0.003                 | 0.004 | 0.003 |

\*Free sialic acids (Sias) and CMP-Sias were destroyed by NaBH<sub>4</sub> treatment.

It showed total cell conjugated form of Sias.

<sup>#</sup>The corresponding amounts of mannose for PMI KO cells were 25  $\mu$ M, 250  $\mu$ M and 1 mM.

**Supplemental Table 5. Kdn relative to Neu5Ac in membrane fraction.**

| Cell line           | Mannose concentration |        |
|---------------------|-----------------------|--------|
|                     | 0 mM                  | 15 mM  |
| HEK293A             | 0                     | 0.0020 |
| BJAB K88            | 0                     | 0.064  |
| BJAB K20            | 0.0042                | 0.11   |
| PMI WT              | 0                     | 0.0014 |
| PMI KO <sup>#</sup> | 0.012                 | 0.0005 |
| HK2                 | 0                     | 0.0035 |

<sup>#</sup>The corresponding amounts of mannose for PMI KO cells were 25  $\mu$ M and 1 mM.

**Supplemental Table 6. Kdn relative to Neu5Ac in membrane fraction of HEK293A with fish *Cmas* transfection.**

| vector          | Mannose concentration |        |
|-----------------|-----------------------|--------|
|                 | 0 mM                  | 15 mM  |
| non-transfected | 0                     | 0.0014 |
| empty vector    | 0                     | 0.0019 |
| *Cmas1          | 0.0043                | 0.0163 |
| *Cmas2          | 0.0076                | 0.0323 |

\*Two types of zebrafish CMP-sialic acid synthetases (*Cmas*) with differential substrate affinity were transiently expressed in HEK293A cells, and non-transfected and empty vector transfected cells were set as controls. Cells were harvested 36 hours post mannose feeding (0 or 15 mM) and membrane fractions were prepared to analyze glycosidically-conjugated form of sialic acids by DMB-HPLC analysis (Kdn relative to Neu5Ac).

**Supplemental Table 7. Identity and homology of human and other vertebrate NANS proteins.**

| Species                           | Accession number<br>(Protein) | Identity | Homology | Class          |
|-----------------------------------|-------------------------------|----------|----------|----------------|
| <i>Acinonyx jubatus</i>           | XP_014934957.1                | 96%      | 98%      | Mammalia       |
| <i>Ailuropoda melanoleuca</i>     | XP_002914976.1                | 96%      | 98%      | Mammalia       |
| <i>Athene cunicularia</i>         | XP_026721911.1                | 84%      | 92%      | Aves           |
| <i>Bison bison bison</i>          | XP_010845354.1                | 97%      | 99%      | Mammalia       |
| <i>Bos mutus</i>                  | XP_005906043.1                | 97%      | 99%      | Mammalia       |
| <i>Bos taurus</i>                 | NP_001039947.1                | 97%      | 99%      | Mammalia       |
| <i>Bubalus bubalis</i>            | XP_006063515.1                | 97%      | 99%      | Mammalia       |
| <i>Callithrix jacchus</i>         | XP_008998209.1                | 98%      | 99%      | Mammalia       |
| <i>Camelus ferus</i>              | XP_006187837.1                | 97%      | 98%      | Mammalia       |
| <i>Canis lupus dingo</i>          | XP_025287783.1                | 96%      | 98%      | Mammalia       |
| <i>Canis lupus familiaris</i>     | XP_538746.2                   | 96%      | 98%      | Mammalia       |
| <i>Capra hircus</i>               | XP_005683962.2                | 97%      | 99%      | Mammalia       |
| <i>Castor canadensis</i>          | XP_020036388.1                | 97%      | 98%      | Mammalia       |
| <i>Cebus capucinus imitator</i>   | XP_017383327.1                | 98%      | 99%      | Mammalia       |
| <i>Ceratotherium simum simum</i>  | XP_004423294.1                | 96%      | 98%      | Mammalia       |
| <i>Chelonia mydas</i>             | XP_007066359.1                | 85%      | 93%      | Reptilia       |
| <i>Cricetulus griseus</i>         | XP_003500141.1                | 95%      | 98%      | Mammalia       |
| <i>Crocodylus porosus</i>         | XP_019410688.1                | 88%      | 93%      | Reptilia       |
| <i>Crotalus adamanteus</i>        | AFJ51454.1                    | 84%      | 94%      | Reptilia       |
| <i>Danio rerio</i>                | NP_996660.1                   | 79%      | 92%      | Actinopterygii |
| <i>Dromaius novaehollandiae</i>   | XP_025955160.1                | 85%      | 94%      | Aves           |
| <i>Echinops telfairi</i>          | XP_004711046.1                | 92%      | 97%      | Mammalia       |
| <i>Equus asinus</i>               | XP_014715223.1                | 96%      | 98%      | Mammalia       |
| <i>Equus caballus</i>             | XP_023485493.1                | 96%      | 98%      | Mammalia       |
| <i>Gallus gallus</i>              | NP_001007976.1                | 87%      | 94%      | Aves           |
| <i>Gekko japonicus</i>            | XP_015281630.1                | 84%      | 94%      | Reptilia       |
| <i>Homo sapiens</i>               | NP_061819.2                   | 100%     | 100%     | Mammalia       |
| <i>Ictalurus punctatus</i>        | NP_001187692.1                | 78%      | 91%      | Actinopterygii |
| <i>Ictidomys tridecemlineatus</i> | XP_005326366.1                | 96%      | 98%      | Mammalia       |
| <i>Lipotes vexillifer</i>         | XP_007461720.1                | 97%      | 98%      | Mammalia       |
| <i>Loxodonta africana</i>         | XP_003407624.1                | 95%      | 98%      | Mammalia       |
| <i>Macaca mulatta</i>             | EHH23940.1                    | 99%      | 99%      | Mammalia       |

|                                                    |                |      |      |                        |
|----------------------------------------------------|----------------|------|------|------------------------|
| <i>Microcebus murinus</i>                          | XP_012624488.1 | 97%  | 99%  | Mammalia               |
| <i>Monodelphis domestica</i>                       | XP_001364128.1 | 87%  | 94%  | Mammalia (Methateria)  |
| <i>Mus musculus</i>                                | NP_444409.1    | 95%  | 97%  | Mammalia               |
| <i>Nanorana parkeri</i>                            | XP_018407945.1 | 76%  | 89%  | Amphibia               |
| <i>Neophocaena asiaeorientalis asiaeorientalis</i> | XP_024590225.1 | 97%  | 98%  | Mammalia               |
| <i>Notechis scutatus</i>                           | XP_026528761.1 | 84%  | 94%  | Reptilia               |
| <i>Nothoprocta perdicaria</i>                      | XP_025893877.1 | 84%  | 91%  | Aves                   |
| <i>Numida meleagris</i>                            | XP_021236216.1 | 87%  | 94%  | Aves                   |
| <i>Odobenus rosmar divergens</i>                   | XP_004392385.1 | 95%  | 98%  | Mammalia               |
| <i>Odocoileus virginianus texanus</i>              | XP_020761234.1 | 96%  | 99%  | Mammalia               |
| <i>Oncorhynchus mykiss</i>                         | XP_021429201.1 | 79%  | 91%  | Actinopterygii         |
| <i>Orcinus orca</i>                                | XP_004271519.1 | 96%  | 98%  | Mammalia               |
| <i>Ornithorhynchus anatinus</i>                    | XP_001506765.1 | 89%  | 95%  | Mammalia (Monotremata) |
| <i>Ovis aries</i>                                  | XP_004005320.3 | 97%  | 99%  | Mammalia               |
| <i>Pan paniscus</i>                                | XP_008972309.1 | 99%  | 99%  | Mammalia               |
| <i>Pan troglodytes</i>                             | XP_024201562.1 | 100% | 100% | Mammalia               |
| <i>Panthera tigris altaica</i>                     | XP_007089351.1 | 96%  | 98%  | Mammalia               |
| <i>Phascolarctos cinereus</i>                      | XP_020860268.1 | 90%  | 94%  | Mammalia (Methateria)  |
| <i>Physeter catodon</i>                            | XP_023982297.1 | 97%  | 98%  | Mammalia               |
| <i>Podarcis muralis</i>                            | XP_028568080.1 | 85%  | 94%  | Reptilia               |
| <i>Pongo abelii</i>                                | XP_002820068.1 | 99%  | 99%  | Mammalia               |
| <i>Salmo salar</i>                                 | ACI33492.1     | 79%  | 91%  | Actinopterygii         |
| <i>Sus scrofa</i>                                  | NP_001172068.1 | 97%  | 99%  | Mammalia               |
| <i>Terrapene carolina triunguis</i>                | XP_024062240.2 | 85%  | 93%  | Reptilia               |
| <i>Tursiops truncatus</i>                          | XP_004322851.1 | 97%  | 98%  | Mammalia               |
| <i>Ursus arctos horribilis</i>                     | XP_026361945.1 | 95%  | 98%  | Mammalia               |
| <i>Vombatus ursinus</i>                            | XP_027714871.1 | 89%  | 94%  | Mammalia (Methateria)  |
| <i>Vulpes vulpes</i>                               | XP_025868953.1 | 96%  | 98%  | Mammalia               |
| <i>Xenopus tropicalis</i>                          | XP_002935918.1 | 76%  | 90%  | Amphibia               |
| <i>Zalophus californianus</i>                      | XP_027470724.1 | 95%  | 98%  | Mammalia               |

Identity (%) and homology (%) of vertebrate NANS protein sequences to *H. sapiens* NANS

NCBI Reference Sequence Numbers are given and species are shaded according to classes:  
Actinopterygii, Amphibia, Aves, Mammalia, Reptilia.



**Supplementary Table 8. Eukaryotic NANS sequences**

| Species                          | Class    | Order          | Family         | Accession number (Protein) | Accession number (mRNA) | Common name                     |
|----------------------------------|----------|----------------|----------------|----------------------------|-------------------------|---------------------------------|
| <i>Acinonyx jubatus</i>          | Mammalia | Carnivora      | Felidae        | XP_014934957.1             | XM_015079471.2          | Cheetah                         |
| <i>Ailuropoda melanoleuca</i>    | Mammalia | Carnivora      | Ursidae        | XP_002914976.1             | XM_002914930.3          | Giant panda                     |
| <i>Athene cunicularia</i>        | Aves     | Strigiformes   | Strigidae      | XP_026721911.1             | XM_026866110.1          | Burrowing owl                   |
| <i>Bison bison bison</i>         | Mammalia | Artiodactyla   | Bovidae        | XP_010845354.1             | XM_010847052.1          | Plains bison                    |
| <i>Bos mutus</i>                 | Mammalia | Artiodactyla   | Bovidae        | XP_005906043.1             | XM_005905981.2          | Wild yak                        |
| <i>Bos taurus</i>                | Mammalia | Artiodactyla   | Bovidae        | NP_001039947.1             | NM_001046482.1          | Cattle                          |
| <i>Bubalus bubalis</i>           | Mammalia | Artiodactyla   | Bovidae        | XP_006063515.1             | XM_006063453.2          | Buffalo                         |
| <i>Callithrix jacchus</i>        | Mammalia | Primates       | Callitrichidae | XP_008998209.1             | XM_008999961.1          | Common marmoset                 |
| <i>Camelus ferus</i>             | Mammalia | Artiodactyla   | Camelidae      | XP_006187837.1             | XM_006187775.2          | Bactrian Camel                  |
| <i>Canis lupus dingo</i>         | Mammalia | Carnivora      | Canidae        | XP_025287783.1             | XM_025431998.1          | Dingo                           |
| <i>Canis lupus familiaris</i>    | Mammalia | Carnivora      | Canidae        | XP_538746.2                | XM_538746.6             | Domestic dog                    |
| <i>Capra hircus</i>              | Mammalia | Artiodactyla   | Bovidae        | XP_005683962.2             | XM_005683905.3          | Goat                            |
| <i>Castor canadensis</i>         | Mammalia | Rodentia       | Castoridae     | XP_020036388.1             | XM_020180799.1          | North American beaver           |
| <i>Cebus capucinus imitator</i>  | Mammalia | Primates       | Cebidae        | XP_017383327.1             | XM_017527838.1          | Colombian white-faced capuchin  |
| <i>Ceratotherium simum simum</i> | Mammalia | Perissodactyla | Rhinocerotidae | XP_004423294.1             | XM_004423237.2          | Southern white rhinoceros       |
| <i>Chelonia mydas</i>            | Reptilia | Testudines     | Cheloniidae    | XP_007066359.1             | XM_007066297.2          | Green sea turtle                |
| <i>Cricetulus griseus</i>        | Mammalia | Rodentia       | Cricetidae     | XP_003500141.1             | XM_027403145.1          | Chinese hamster                 |
| <i>Crocodylus porosus</i>        | Reptilia | Crocodylia     | Crocodylidae   | XP_019410688.1             | XM_019555143.1          | Saltwater crocodile             |
| <i>Crotalus adamanteus</i>       | Reptilia | Squamata       | Viperidae      | AFJ51454.1                 | JU175930.1              | Eastern diamondback rattlesnake |

|                                                    |                |                 |                 |                  |                |                                |
|----------------------------------------------------|----------------|-----------------|-----------------|------------------|----------------|--------------------------------|
| <i>Danio rerio</i>                                 | Actinopterygii | Cypriniformes   | Cyprinidae      | NP_996660.1      | NM_206829.1    | Zebrafish                      |
| <i>Dromaius novohollandiae</i>                     | Aves           | Casuariiformes  | Casuariidae     | XP_025955160.1   | XM_026099375.1 | Emu                            |
| <i>Echinops telfairi</i>                           | Mammalia       | Afrosoricida    | Tenrecidae      | XP_004711046.1   | XM_004710989.1 | Lesser hedgehog tenrec         |
| <i>Equus asinus</i>                                | Mammalia       | Perissodactyla  | Equidae         | XP_014715223.1   | XM_014859737.1 | Donkey                         |
| <i>Equus caballus</i>                              | Mammalia       | Perissodactyla  | Equidae         | XP_023485493.1   | XM_023629725.1 | Horse                          |
| <i>Gallus gallus</i>                               | Aves           | Galliformes     | Phasianidae     | NP_001007976.1   | NM_001007975.1 | Red junglefowl                 |
| <i>Gekko japonicus</i>                             | Reptilia       | Squamata        | Gekkonidae      | XP_015281630.1   | XM_015426144.  | Schlegel's Japanese gecko      |
| <i>Homo sapiens</i>                                | Mammalia       | Primates        | Hominidae       | NP_061819.2      | NM_018946.4    | Human                          |
| <i>Ictalurus punctatus</i>                         | Actinopterygii | Siluriformes    | Ictaluridae     | NP_001187692.1   | NM_001200763.2 | Channel catfish                |
| <i>Ictidomys tridecemlineatus</i>                  | Mammalia       | Rodentia        | Sciuridae       | XP_005326366.1   | XM_005326309.2 | Thirteen-lined ground squirrel |
| <i>Lipotes vexillifer</i>                          | Mammalia       | Artiodactyla    | Lipotidae       | XP_007461720.1   | XM_007461658.1 | Bajidolphin                    |
| <i>Loxodonta africana</i>                          | Mammalia       | Proboscidea     | Elephantidae    | XP_003407624.1 [ | XM_003407576.2 | African bush elephant          |
| <i>Macaca mulatta</i>                              | Mammalia       | Primates        | Cercopithecidae | EHH23940.1       | XM_015117229.2 | Rhesus macaque                 |
| <i>Microcebus murinus</i>                          | Mammalia       | Primates        | Cheirogaleidae  | XP_012624488.1   | XM_012769034.1 | Gray mouse lemur               |
| <i>Monodelphis domestica</i>                       | Mammalia       | Didelphimorphia | Didelphidae     | XP_001364128.1   | XM_001364091.4 | Gray short-tailed opossum      |
| <i>Mus musculus</i>                                | Mammalia       | Rodentia        | Muridae         | NP_444409.1      | NM_053179.3    | House mouse                    |
| <i>Nanorana parkeri</i>                            | Amphibia       | Anura           | Dicroglossidae  | XP_018407945.1   | XM_018552443.1 | High Himalaya frog             |
| <i>Neophocaena asiaeorientalis asiaeorientalis</i> | Mammalia       | Artiodactyla    | Phocoenidae     | XP_024590225.1   | XM_024734457.  | Narrow-ridged finless porpoise |

|                                       |                |               |                   |                    |                    |                           |
|---------------------------------------|----------------|---------------|-------------------|--------------------|--------------------|---------------------------|
| <i>Notechis scutatus</i>              | Reptilia       | Squamata      | Elapidae          | XP_0265287<br>61.1 | XM_0266729<br>76.1 | Tiger snake               |
| <i>Nothoprocta perdicaria</i>         | Aves           | Tinamiformes  | Tinamidae         | XP_0258938<br>77.1 | XM_0260380<br>92.  | Chilean tinamou           |
| <i>Numida melagris</i>                | Aves           | Galliformes   | Numididae         | XP_0212362<br>16.1 | XM_0213805<br>41.1 | Helmeted guineafowl       |
| <i>Odobenus rosmarus divergens</i>    | Mammalia       | Carnivora     | Odobenidae        | XP_0043923<br>85.1 | XM_0043923<br>28.1 | Walrus                    |
| <i>Odocoileus virginianus texanus</i> | Mammalia       | Artiodactyla  | Cervidae          | XP_0207612<br>34.1 | XM_0209055<br>75.1 | White-tailed deer         |
| <i>Oncorhynchus mykiss</i>            | Actinopterygii | Salmoniformes | Salmonidae        | XP_0214292<br>01.1 | GBTD011617<br>35.1 | Rainbow trout             |
| <i>Orcinus orca</i>                   | Mammalia       | Artiodactyla  | Delphinidae       | XP_0042715<br>19.1 | XM_0042714<br>71.1 | Orca                      |
| <i>Ornithorhynchus anatinus</i>       | Mammalia       | Monotremata   | Ornithorhynchidae | XP_0015067<br>65   | XM_0015067<br>15.5 | Platypus                  |
| <i>Ovis aries</i>                     | Mammalia       | Artiodactyla  | Bovidae           | XP_0040053<br>20.3 | XM_0040052<br>71.3 | Sheep                     |
| <i>Pan paniscus</i>                   | Mammalia       | Primates      | Hominidae         | XP_0089723<br>09.1 | XM_0089740<br>61.2 | Bonobo                    |
| <i>Pan troglodytes</i>                | Mammalia       | Primates      | Hominidae         | XP_0242015<br>62.1 | XM_0243457<br>94.1 | Chimpanzee                |
| <i>Panthera tigris altaica</i>        | Mammalia       | Carnivora     | Felidae           | XP_0070893<br>51.1 | XM_0070892<br>89.2 | Siberian tiger            |
| <i>Phascolarctos cinereus</i>         | Mammalia       | Diprotodontia | Phascolarctidae   | XP_0208602<br>68.1 | XM_0210046<br>09.1 | Koala                     |
| <i>Physeter catodon</i>               | Mammalia       | Artiodactyla  | Physeteridae      | XP_0239822<br>97.1 | XM_0241265<br>29.2 | Sperm whale               |
| <i>Podarcis muralis</i>               | Reptilia       | Squamata      | Lacertidae        | XP_0285680<br>80.1 | XM_0287122<br>47.1 | Common wall lizard        |
| <i>Pongo abelii</i>                   | Mammalia       | Primates      | Hominidae         | XP_0028200<br>68.1 | XM_0028200<br>22.4 | Sumatran orangutan        |
| <i>Salmo salar</i>                    | Actinopterygii | Salmoniformes | Salmonidae        | ACI33492.1         | BT045230.1         | Atlantic salmon           |
| <i>Sus scrofa</i>                     | Mammalia       | Artiodactyla  | Suidae            | NP_0011720<br>68.1 | NM_0011851<br>39.1 | Wild boar                 |
| <i>Terrapene carolina triunguis</i>   | Reptilia       | Testudines    | Emydidae          | XP_0240622<br>40.2 | XM_0266463<br>79.2 | Three-toed box turtle     |
| <i>Tursiops truncatus</i>             | Mammalia       | Artiodactyla  | Delphinidae       | XP_0043228<br>51.1 | XM_0043228<br>03.2 | Common bottlenose dolphin |
| <i>Ursus arctos horribilis</i>        | Mammalia       | Carnivora     | Ursidae           | XP_0263619<br>45.1 | XM_0265061<br>60.1 | Grizzly bear              |
| <i>Vulpes vulpes</i>                  | Mammalia       | Carnivora     | Canidae           | XP_0258689<br>53.1 | XM_0260131<br>68.1 | Red-fox                   |
| <i>Vombatus ursinus</i>               | Mammalia       | Diprotodontia | Vombatidae        | XP_0277148<br>71.1 | XM_0278590<br>70.1 | Common wombat             |

|                               |          |           |           |                |                |                     |
|-------------------------------|----------|-----------|-----------|----------------|----------------|---------------------|
| <i>Xenopus tropicalis</i>     | Amphibia | Anura     | Pipidae   | XP_002935918.1 | XM_002935872.4 | Western clawed frog |
| <i>Zalophus californianus</i> | Mammalia | Carnivora | Otariidae | XP_027470724.1 | XM_027614923.  | California sea lion |

Vertebrate NANS sequences: Taxonomy, common names and accession numbers Taxonomy and common names of vertebrates included in phylogenetic analyses (Figure 5) are shown with species shaded according to classes: Actinopterygii (light purple), Amphibia (pink), Aves (dark purple) Mammalia (green), Reptilia (blue). NCBI Reference Sequence Numbers of NANS protein and mRNA sequences.
